# Supplementary material for: Gut Dysbiosis and Its Associations with Gut Microbiota-Derived Metabolites in Dogs with Myxomatous Mitral Valve Disease
Source: PubMed Central journal article supplement (PMC8546968; doi:10.1128/msystems.00111-21), 2021-04-20

A

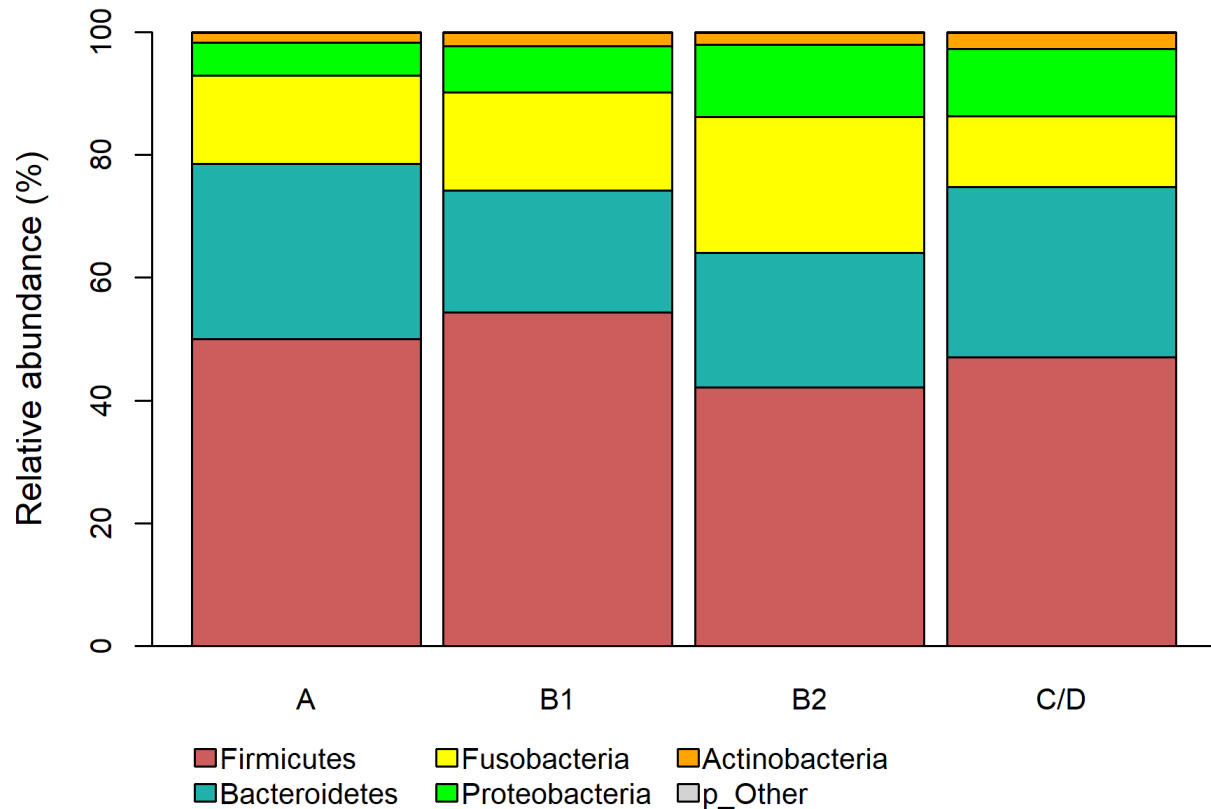

B

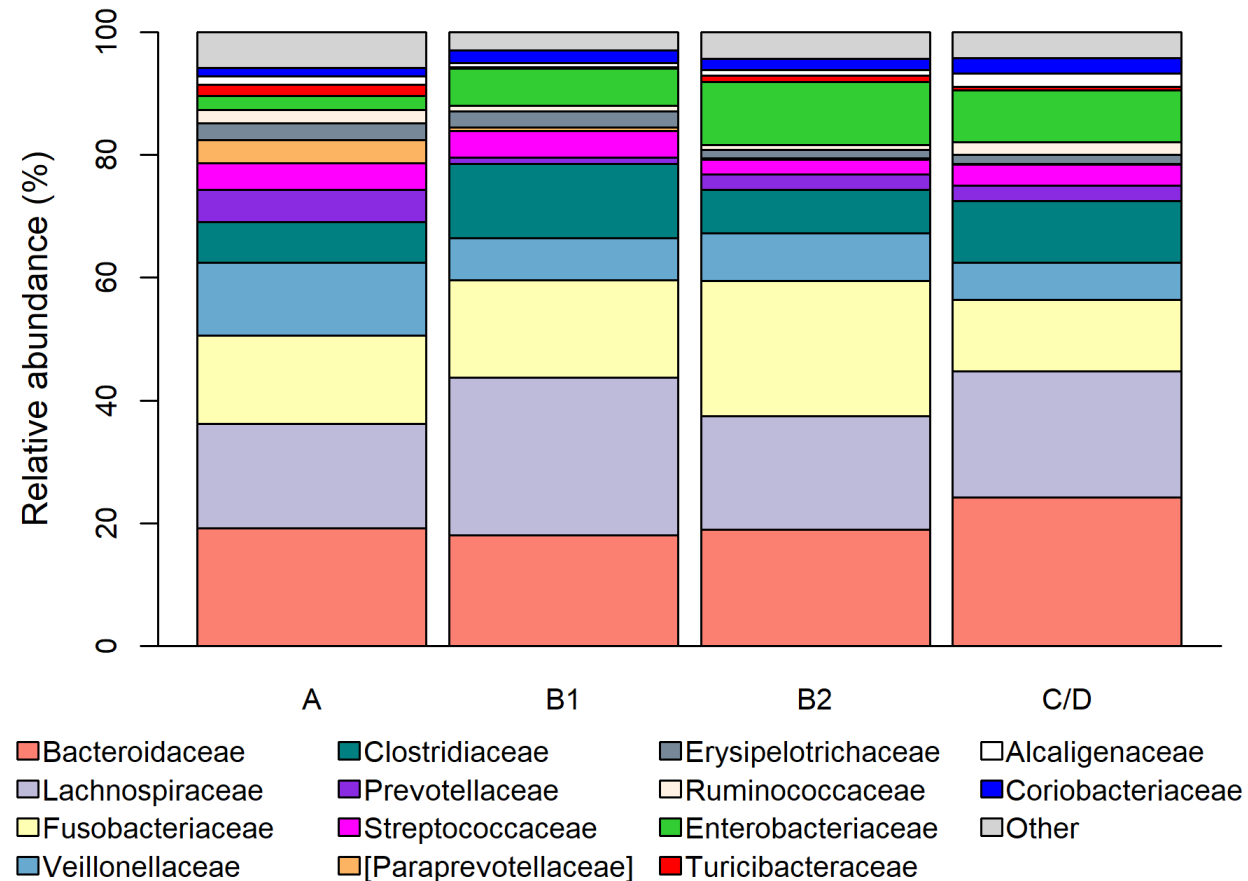

Supplement: msystems.00111-21-sf001.pdf [file msystems.00111-21-sf001.pdf]
